# Supplementary material for: Challenges toward Sustainability? Experiences and Approaches to Literary Tourism from Iran
Source: MDPI journal article supplement (doi:10.3390/su141811709), 2022-09-18
Supplement: s1 [file s1]

**Table S1.** The list of 88 basic themes representing ‘challenges’ to the Development of Literary Tourism in Iran.

| initial theme<br>(open coding)         | basic contents                                                                                                                                                                                  | doc |
|----------------------------------------|-------------------------------------------------------------------------------------------------------------------------------------------------------------------------------------------------|-----|
| ضعف جایگاه شهرهای ادبی                 | شهرهای ادبی ایران از جمله شیراز هیچ جایگاهی در میان مقصدهای گردشگری ادبی جهان ندارند.                                                                                                           | 1   |
| ضعف حمایت دولت                         | دولت از برگزاری همایش بین‌المللی «گردشگری ادبی» هیچ استقبالی نکرد                                                                                                                               | 2   |
| خانه و املاک نویسندگان                 | خانه و مایملک بسیاری از مفاخر ادبی یا تخریب شده یا اگر مختصری هست نیز، در خلال بی‌توجهی دارد                                                                                                    | 3   |
| کم توجهی به میراث ادبی                 | کم توجهی به میراث ادبی کشور پیامدهای بسیاری در پی خواهد داشت                                                                                                                                    | 4   |
| ناشناخته ماندن ظرفیت ها                | ظرفیت های گردشگری ادبی در ایران هنوز ناشناخته است                                                                                                                                               | 5   |
| مصادره مشاهیر ادبی                     | مصادره شاعرانی چون نظامی و مولانا توسط آذربایجان و ترکیه از مسائل کنونی است.                                                                                                                    | 6   |
| مصادره‌ی میراث فرهنگی                  | در زمینه‌ی مصادره‌ی میراث فرهنگی ایران، نقد اصلی به رفتار خود ما وارد است، ما هیچ اهمیتی به شاعران و ادبای ایرانی نمی‌دهیم و برای ما تفاوتی نمی‌کند که شاعری به کشور ما یا کشوری دیگر تعلق دارد | 7   |
| کم توجهی به میراث مشاهیر               | کم توجهی یا بی توجهی به میراث مشاهیر ادبی ایران مساله ای بارز است.                                                                                                                              | 8   |
| ضعف در معرفی ادبیات                    | ضعف در شناساندن شخصیت های ادب پارسی به مردم جهان وجود دارد                                                                                                                                      | 9   |
| ارث و اصالت مکان                       | مساله ارث در ایران به از بین رفتن اصالت مکان ادبی خانه نویسنده می انجامد                                                                                                                        | 10  |
| بین رفتن اصالت مکان                    | کم توجهی به میراث ادبی به از بین رفتن اصالت مکان ادبی منجر می شود                                                                                                                               | 11  |
| سوء برداشت از مفهوم گردشگری ادبی       | رفع سوء برداشت از مفهوم گردشگری ادبی و شناخت درست مفهوم گردشگری ادبی (گردشگری ادبی، تنها رفتن به مزار ادیبان نیست)                                                                              | 12  |
| بی توجهی به ادبیات                     | ما توجهی به ادبیات خود نمی‌کنیم در حالی که ادبیات ما منبع الهام برای ادبیات جهان بوده است                                                                                                       | 13  |
| مغفل ماندن میراث                       | بهرگیری مناسبی از پتانسیل‌های میراث ادبی به عمل نمی آید                                                                                                                                         | 14  |
| کم توجهی به میراث هویتی                | شهرهای ما از بی‌هویتی رنج می‌برد: بی هویتی ناشی از کم توجهی به میراث فرهنگی .                                                                                                                   | 15  |
| مکانمند نبودن ادبیات                   | رمان‌نویسان ما خجالت می‌کشند به اسم مکان‌ها اشاره کنند.                                                                                                                                         | 16  |
| مکانمند نبودن                          | داستان‌های ما در بی‌مکانی و بی‌زمانی می‌گذرند                                                                                                                                                   | 17  |
| مکانمند نبودن                          | ضعف مکان مندی و زمانمندی ادبیات داستانی و رمان نویسی در ایران                                                                                                                                   | 18  |
| بی توجهی به میراث                      | بی توجهی به پتانسیل‌های میراث ادبی همچنان ادامه دارد                                                                                                                                            | 19  |
| از بین رفتن خانه نویسندگان معاصر       | ما به‌اراهای عینی چندان از مکان‌های واقعی گردشگری ادبی برای ما باقی نمانده است.                                                                                                                 | 20  |
| رنج بی هویتی ناشی از بی توجهی به میراث | شهرهای ما از بی هویتی رنج می‌برند و مکان‌هایی که می‌توانند برای شماری از گردشگران جالب باشند، معرفی نمی‌شوند.                                                                                   | 21  |
| ضعف در معرفی میراث                     | از دست رفتن میراث مادی ادبی، و عدم معرفی میراث ادبی به گردشگران مساله جدی در این باره است.                                                                                                      | 22  |
| نا توانی در طراحی تورهای ادبی          | سفرنامه‌هایی مانند سفرنامه ناصر خسرو می‌توانند الهام بخش طراحی تورهای ادبی باشند                                                                                                                | 23  |
| ضعف در معرفی ادبیات                    | ضعف در شناساندن شخصیت های ادب پارسی به مردم جهان                                                                                                                                                | 24  |
| کم کاری و کم توجهی توجهی               | با این همه کم کاری چگونه انتظار داشته باشیم در کشور ما هم مثل کشور های دیگر گردشگری فرهنگی و ادبی مورد اقبال قرار گیرد                                                                          | 25  |
| نا توانی در تبلیغ و بازار یابی         | متولیان بخش گردشگری در تبلیغ و عرضه قابلیت‌های گردشگری ادبی ایران به بازار گردشگری بسیار ضعیف عمل کرده اند.                                                                                     | 26  |
| ناآشنایی با گردشگری ادبی               | ناآشنایی مدیران و مسئولان بخش گردشگری کشور با گردشگری ادبی از مشکلات بنیادین در این زمینه به شمار می آید                                                                                        | 27  |
| کم توجهی به میراث ادبی                 | کم توجهی نهادهای مسئول از مسائل جد گردشگری ادبی است.                                                                                                                                            | 28  |
| ضعف حمایت دولت                         | ضعف حمایت از توسعه گردشگری ادبی مشهود است.                                                                                                                                                      | 29  |
| مغفل ماندن گردشگری ادبی                | در حال حاضر به طور مشخص و شناخته شده شکلی گردشگری تحت عنوان "گردشگری ادبی" در ایران نداریم.                                                                                                     | 30  |
| بی توجهی به شهرهای ادبی                | برخلاف شهرهای ادبی ایران گردشگری ادبی در بسیاری از شهرهای جهان رونق پیدا کرده است.                                                                                                              | 31  |
| نبود مسیرهای ادبی                      | تعریف مسیرهای گردشگری ادبی در ارتباط با مکان های زندگی و فعالیت علمی نویسندگان مورد توجه قرار نگرفته است.                                                                                       | 32  |
| نبود تحقیقات بنیادین و کاربردی         | تعریف مسیر برای "گردشگری ادبی" بدون انجام تحقیقات علمی مفصل ممکن نیست.                                                                                                                          | 33  |
| شناخت ضعیف                             | فعالیت در زمینه گردشگری ادبی بدون شناخت لازم از آن مشکل زا است!                                                                                                                                 | 34  |
| ضعف در درآمدزایی از گردشگری ادبی       | حالا با توجه به پتانسیلهای بسیار بالای توسعه گردشگری ادبی در ایران سهم درآمدی ما از گردشگری ادبی چقدر است!                                                                                      | 35  |
| ضعف کلی در بخش گردشگری                 | به طور کلی ایران از جایگاه قابل توجهی در بخش گردشگری جهان برخوردار نیست چه رسد به گردشگری ادبی.                                                                                                 | 36  |
| انحصارگرایی‌ها و حساسیت‌ها             | خانه برخی نویسندگان مانند صادق هدایت به دلیل بی توجهی به مهد کودک تبدیل شده است.                                                                                                                | 37  |
| بی توجهی به ظرفیت ها                   | به ظرفیتهای گردشگری ادبی استانهای مختلف ایران بی توجهی می شود.                                                                                                                                  | 38  |
| نبود مسیر ادبی                         | نه مسیری برایش تعریف کرده‌ایم و نه جاذبه‌های آن را به درستی شناسایی کرده‌ایم.                                                                                                                   | 39  |
| ضعف در معرفی م                         | چرا کشوری که بزرگترین سرمایه‌ی فرهنگی آن شعر است، هنوز نتوانسته جاذبه‌های ادبی خود را به گردشگری و گردشگران بشناساند؟                                                                           | 40  |
| تک بعدی بودن                           | به جز مقبره‌های مفاخر فرهنگی نمونه‌ی دیگری را برای گردشگری ادبی معرفی نکرده‌ایم.                                                                                                                | 41  |
| کوتاهی مسئولان                         | کوتاهی مسئولان در حفظ میراث فرهنگی و ادب کشور نزد کارشناسان محسوس است.                                                                                                                          | 42  |
| از بین رفتن اصالت                      | تخریب میراث فرهنگی و خانه های ادبی توسط بساز بفروشان نگران کننده است.                                                                                                                           | 43  |
| عمل کرده                               | مسئولان در پرداختن به گردشگری فرهنگی و ادبی شعاری عمل می کنند.                                                                                                                                  | 44  |
| ناآشنایی                               | کم اطلاعی و بی اطلاعی ایرانیان از میراث فرهنگی و ادبی از مسائل ریشه ای گردشگری ادبی شناخته می شود.                                                                                              | 45  |
| بی توجهی                               | بی توجهی متولیان فرهنگی به گردشگری ادبی در کشور نا امید کننده است.                                                                                                                              | 46  |
| نداشتن موزه ادبی                       | تا کنون حتی يك موزه استاندارد ادبی در ایران ساخته نشده است.                                                                                                                                     | 47  |
| بی رونقی گردشگری فرهنگی                | بسیاری از دست‌اندرکاران صنعت گردشگری ادبی دلیل اصلی عدم موفقیت این حوزه در ایران را به عدم رونق گردشگری فرهنگی در امکان واقعی، خیالی یا حتی ساختگی ربط می‌دهند.                                 | 48  |
| بی توجهی                               | بی توجهی به جاذبه‌های ساختگی و خیالی و بر نامه های جذاب برای گردشگران در مکانهای گردشگری مشهود است.                                                                                             | 49  |
| ضعف سرمایه گذاری                       | در حوزه گردشگری ادبی سرمایه‌گذاری بسیار ناچیز است.                                                                                                                                              | 50  |
| تبلیغات منفی خارجی                     | ذهنیت گردشگران خارجی مبنی بر ناامن بودن ایران ناشی از سیاست ستیزه جوئه برخی کشورها است.                                                                                                         | 51  |
| ضعف در بهره گیری از فضای مجازی         | تاکنون از ظرفیت های نامحدود فضای مجازی برای معرفی جاذبه های گردشگری ایران بهره برداری مناسب نشده است.                                                                                           | 52  |
| محدود نگر                              | گردشگری ادبی را خلاصه در شیراز می دانیم.                                                                                                                                                        | 53  |
| محدود نگر                              | بسیاری آن چیزی که در شیراز هم به وقوع می‌پیوندد گردشگری ادبی نیست، بلکه دیدار از قبور و آرامگاه‌هاست                                                                                            | 54  |

|    |                                                                                                                                                                                        |                              |
|----|----------------------------------------------------------------------------------------------------------------------------------------------------------------------------------------|------------------------------|
| 55 | خلاصه کردن مقاصد گردشگری ادبی در چند شهر مهم و غفلت از جاذبه ای ادبی دیگر از مسائل مهم گردشگری ادبی شناخته می شود.                                                                     | محدود نگری                   |
| 56 | در زمینه گردشگری ادبی و فرهنگی برخی کشورها از هیچ همه چیز می سازند، اما در کشور ما از میراث غنی و داشته های موجود بهره برداری نمی شود.                                                 | کم توجهی                     |
| 57 | تورهای گردشگری در ایران علمی و حرفه ای نیستند.                                                                                                                                         | نبود نیروی انسانی ماهر       |
| 58 | بی توجهی به ظرفیت عظیم افسانه و اسطوره های ملی از مشکلات توسعه گردشگری ادبی است.                                                                                                       | بی توجهی به اسطوره و افسانه  |
| 59 | سخنان زیادی درباره گردشگری ادبی گفته شده است اما امروز با فرا رسیدن بزرگداشت دوباره حافظ شاهد هیچ تغییری در این زمینه نیستیم                                                           | شعری عمل کردن                |
| 60 | تا هنگامی که غفلت و بهره نبردن از داشته های میراث ادبی جریان دارد گردشگری ادبی هم رونق نخواهد گرفت                                                                                     | بی توجهی به میراثی           |
| 61 | البته برگزاری جشنواره های ادبی یکی دیگر از فعالیت های مرتبط با این گردشگری است.                                                                                                        | برگزاری جشنواره های ادبی     |
| 62 | ناتوانی در حفظ میراث ادبی از موانع بزرگ گردشگری ادبی در کشور است.                                                                                                                      | ناتوانی در حفظ میراث         |
| 63 | بناهای ادبی ساخته شده در ایران از شکوه و جذابیت بالایی برخوردار نیستند.                                                                                                                | ضعف پادمان ها                |
| 64 | ببینید بعضی بناها حس و حال را ندارند                                                                                                                                                   | معماری بی معنا               |
| 65 | به تغییر الگوی گردشگری از تاریخی صر □ به ادبی و فرهنگی توجهی نشده است.                                                                                                                 | تغیر الگو                    |
| 66 | امکانات پذیرایی از گردشگران ادبی اندک است.                                                                                                                                             | ضعف امکانات پذیرایی          |
| 67 | متأسفانه گردشگری ادبی ما در بازدید از مقابر سوت و کور خلاصه می شود                                                                                                                     | محدود نگری                   |
| 68 | گردشگران ادبی به قوتیه می روند تا مقبره مولانا را ببینند با مجموعه ها موجود در آنجا آشنا شوند و در برنامه های فرهنگی ادبی شرکت کنند در حال که ما در این زمینه بسیار ضعیف عمل کرده ایم. | بی توجهی به میراث            |
| 69 | اینجا همه چیز در یک سنگ قبر خلاصه می شود.                                                                                                                                              | محدودنگری                    |
| 70 | خانه سهراب سپهری کجاست؟ چرا شناختی از میراث زندگی این شاعر بزرگ در دست نیست.                                                                                                           | از بین رفتن اصالت            |
| 71 | گردشگری ادبی نباید تنها گردشگری مردگان ادبی باشد.                                                                                                                                      | محدودنگری                    |
| 72 | هنوز متولیان فرهنگی کشور پتانسیل های گردشگری ادبی را بلور نکرده اند.                                                                                                                   | ضعف باور مسوولان             |
| 73 | متولیان میراث فرهنگی کشور به سبب کم کاری در حفاظت از جاذبه های ادبی کمتر مورد انتقاد قرار می گیرند.                                                                                    | کم کاری در حفاظت از میراث    |
| 74 | جاذبه های گردشگری ادبی معاصر و میراث به جای مانده از نویسندگان معاصر همواره با بی مهری روبرو بوده است.                                                                                 | بی توجهی به ادبیات           |
| 75 | هرگز تاکنون زحمت ساخت موزه ای در خور و شایسته ی ادبیات ایران را به جان نخریده ایم                                                                                                      | نبود موزه ادب                |
| 76 | گردشگری ادبی و اهمیت آن هنوز برای مسوولان و متولیان ملموس نشده است.                                                                                                                    | ناشناخته ماندن               |
| 77 | کم اطلاعی بدنه اجتماع با نویسندگان و مشاهیر ادبی یکی از موانع رشد انبوده گردشگری ادبی در کشور است.                                                                                     | ناآگاهی                      |
| 78 | بخشی از بی توجهی و شاید بی اطلاعی از انواع گردشگری ادبی برداشت نادرست و محدود دانستن این شکل از گردشگر ی فرهنگی به بازدید از آرامگاه نویسندگان است.                                    | بی توجهی به میراث            |
| 79 | فضایی سنیزه جویانه با بخش هایی از تاریخ و فرهنگ ایران در اندیشه برخی ها هنوز دیده می شود.                                                                                              | سنیزه جویی فرهنگی            |
| 80 | نگرش منفی به بخشی از تاریخ و فرهنگ ایران سبب بی توجهی به میراث بازمانده از آنها شده است.                                                                                               | نگرش منفی                    |
| 81 | ما در حفظ اصالت بسیاری از مکان های گردشگری ادبی ناتوان بوده ایم                                                                                                                        | ناتوانی در حفظ اصالت و میراث |
| 82 | سینمای ایران در قیاس با سینمای دیگر کشورها در نشان دادن ایران به صورتی که باعث جذب گردشگر شود، ضعیف دارد.                                                                              | ضعف صنعت سینما               |
| 83 | ایرانیان درباره فرهنگ پیشینیان خود خیلی تفاخر می کنند، اما چندان رغبتی برای بازدید از بازمانده های این فرهنگ ندارند.                                                                   | شعاری عمل کردن               |
| 84 | ما به جای عمل گرایی در عرصه گردشگری خلاق فرهنگی و هنری، بیشتر شعار می دهیم.                                                                                                            | شعاری عمل کردن               |
| 85 | ظرفیت های گردشگری ادبی به عنوان یک شاخه بسیار مهم از گردشگری فرهنگی در ایران مغفول باقیمانده است.                                                                                      | ناشناخته ماندن               |
| 86 | گویی گردشگری ادبی تنها بازدید از پادمان ها و آرامگاه های نویسندگان است.                                                                                                                | محدودنگری                    |
| 87 | ایران از جایگاه قابل توجهی در بخش گردشگری در سطح جهان برخوردار نیست .                                                                                                                  | ضعف کلی در بخش گردشگری       |
| 88 | ضعف مدیران سازمان های میراث فرهنگی کشور به ندرت به چالش کشیده می شود.                                                                                                                  | کم کاری در حفاظت از میراث    |

**Table S2.** The list of 165 basic themes representing strategies for the development and promotion of literary tourism in Iran (hereafter ‘approaches’).

| initial themes<br>(open coding)              | basic contents                                                                                                                                                                            | doC |
|----------------------------------------------|-------------------------------------------------------------------------------------------------------------------------------------------------------------------------------------------|-----|
| تهیه نقشه گردشگری ادبی                       | تهیه نقشه گردشگری برای رمان‌های مشهور مانند رمان کلیدر محمود دولت‌آبادی                                                                                                                   | 1   |
| حمایت مالی دولت                              | حمایت مالی دولت از همایش بین‌المللی «گردشگری ادبی»                                                                                                                                        | 2   |
| بهره‌گیری از انواع پتانسیل‌ها                | بهره‌گیری از پتانسیل‌های فراوان ادبی ایران برای رونق بخشی به گردشگری ادبی                                                                                                                 | 3   |
| طراحی مسیر گردشگری ادبی                      | طراحی مسیرهای گردشگری ادبی در کشور                                                                                                                                                        | 4   |
| رونق بخشی بر اجراهای ادبی                    | اجرای پرفورمنس‌های ادبی مانند نقالی شاهنامه برای گردشگران ادبی                                                                                                                            | 5   |
| ساخت مکان‌های ادبی اقتصادی                   | اقتباس از آثار ادبی برای طراحی و ساخت مکان‌های گردشگری ادبی (جاذبه ادبی)                                                                                                                  | 6   |
| تسهیل فعالیت متخصصان                         | ارایه تسهیلات به متخصصان گردشگری برای فعالیت در زمینه گردشگری ادبی (مانند مجوز تاسیس اژانس‌های تخصصی)                                                                                     | 7   |
| بهره‌گیری از غنای میراث ادبی                 | در کشور ما منابع ادبی غنی مانند شاهنامه فردوسی می‌توانند نمادی برای توسعه گردشگری ادبی باشند                                                                                              | 8   |
| ارج نهادن به میراث ادبی                      | ارج نهادن به انواع میراث ادبی بازمانده از نویسندگان و شاعران                                                                                                                              | 9   |
| آثار چهره ماندگار                            | چهره‌های ماندگار ادبی، و آثار آن‌ها برای توسعه گردشگری ادبی مورد استفاده قرار گیرند                                                                                                       | 10  |
| پشتیبانی از تورهای ادبی                      | حمایت از اجرای تورهای ادبی برای بالابردن شناخت مردم از مشاهیر و جاذبه‌های گردشگری ادبی                                                                                                    | 11  |
| طراحی مسیرهای ادبی اقتصادی                   | معرفی مسیرهای گردشگری ادبی بر اساس متون ادبی مانند آثار نظامی                                                                                                                             | 12  |
| ساخت مکان‌های ادبی اقتصادی                   | بهره‌گیری از روایت‌های داستانی برای ایجاد و ساخت مکان ادبی                                                                                                                                | 13  |
| ساخت جاذبه‌های ادبی اقتصادی                  | بهره‌برداری از روایت‌های ادبی برای تولید جاذبه ادبی                                                                                                                                       | 14  |
| طراحی مسیرهای ادبی اقتصادی                   | بهره‌گیری از ظرفیت‌های میراث ادبی برای طراحی مسیر سفر ادبی، معماری مکان‌های گردشگری و اجراهای هنری                                                                                        | 15  |
| مکانیابی مبتنی بر روایت ادبی                 | مکان‌یابی جاذبه‌های ادبی بر اساس روایت‌های ادبی موجود در آثار ادبی                                                                                                                        | 16  |
| شناخت مسیرهای ادبی                           | شناسایی مکان‌ها و مسیرهای ادبی و باز زنده‌سازی آنها                                                                                                                                       | 17  |
| حفاظت از میراث ادبی                          | استفاده از راهبردهای مناسب در حفاظت و پاسداری از میراث ادبی                                                                                                                               | 18  |
| اجراهای ادبی اقتصادی                         | اقتباس از آثار ادبی برای اجراهای هنری در قالب تور ادبی                                                                                                                                    | 19  |
| تبلیغ و بازاریابی الکترونیک                  | تبلیغ، بازاریابی و اجرای تورهای ادبی با کمک اینترنت                                                                                                                                       | 20  |
| تنوع بخشی به تور ادبی                        | تنوع بخشی به برنامه‌های تورهای ادبی برای بالابردن جذابیت آنها مورد توجه قرار گیرد.                                                                                                        | 21  |
| بهره‌گیری از ظرفیت‌های متنوع                 | شناخت ظرفیت‌های متنوع گردشگری ادبی و سرمایه‌گذاری در این زمینه لازم است.                                                                                                                  | 22  |
| بهره‌گیری از الگوهای موفق                    | از تجربه‌های موفقیت‌آمیز دیگر کشور‌های جهان در جهت توسعه گردشگری ادبی بهره‌گیری به عمل آید.                                                                                               | 23  |
| برگزاری رویدادهای ادبی                       | از طریق برگزاری انواع رویدادهای ادبی به معرفی ادبا و شاعران خود به جهانیان اهتمام ورزیم.                                                                                                  | 24  |
| جلب مشارکت مردم در حفاظت از میراث ادبی       | حفاظت از میراث فرهنگی-ادبی از طریق اجماع‌نهادی و مشارکت جمعی در دستور کار برنامه ریزان قرار گیرد.                                                                                         | 25  |
| تنوع بخشی به تورهای ادبی                     | یکی از راه‌های تنوع بخشی به بسته‌های تور ادبی مانند، انجام کارهایی چون «مشتوی‌درمائی»، و «خوانش ادبیات در طبیعت» است.                                                                     | 26  |
| خانه نویسندگان به جاذبه ادبی                 | خانه نویسندگان به جاذبه گردشگری ادبی (مانند موزه ادبی) تبدیل شوند.                                                                                                                        | 27  |
| فضاهای ادبی                                  | با بهره‌گیری از قابلیت‌های مکان و محل خلق آثار ادبی به توسعه و ترویج گردشگری ادبی پرداخته شود.                                                                                            | 28  |
| آموزش راهنمای تور ادبی                       | آموزش راهنمایان تخصصی تورهای گردشگری ادبی مورد توجه قرار گیرد.                                                                                                                            | 29  |
| فرهنگ عامه                                   | از داستان‌های فرهنگ عامه (فولکلور) برای ساخت مکان‌ها یا جاذبه‌های ادبی بهره‌گیری گردد.                                                                                                    | 30  |
| ساخت مکان‌های ادبی اقتصادی                   | مکان‌هایی ادبی بر اساس شرح روایت‌های ادبی ساخته شود.                                                                                                                                      | 31  |
| بهره‌گیری از انواع پتانسیل‌ها                | از پتانسیل‌های فراوان ادبی ایران برای رونق بخشی به گردشگری ادبی بهره‌گیری شود.                                                                                                            | 32  |
| آرامگاه و خانه نویسندگان                     | هزاران شاعر و نویسنده و ادیب در این سرزمین زیسته‌اند، که خانه‌ها و مقبره‌هایشان می‌تواند میعادگاه علاقه‌مندان به ادبیات و گردشگری باشد                                                    | 33  |
| جشنواره ادبی                                 | برگزاری جشنواره‌های ادبی یکی دیگر از فعالیت‌های مرتبط با این گردشگری است                                                                                                                  | 34  |
| بهره‌گیری از انواع پتانسیل‌ها                | از پتانسیل‌های فراوان ادبی ایران برای رونق بخشی به گردشگری ادبی بهره‌گیری شود                                                                                                             | 35  |
| به فعالیت درآوردن پتانسیل‌ها                 | باید سازماندهی و بسترسازی‌های لازم را انجام دهیم تا پتانسیل‌های موجود در ایران را بالفعل کنیم که در نتیجه آن جایگاه و اهمیت گردشگری ادبی ما بهتر نمایانده شود                             | 36  |
| به فعالیت درآوردن پتانسیل‌ها                 | استعدادهای و پتانسیل‌های موجود در میراث ادبی به فعالیت درآورد.                                                                                                                            | 37  |
| کارهای خلاق ادبی                             | پتانسیل کارهای خلاقانه فراوانی در گردشگری ادبی وجود دارد.                                                                                                                                 | 38  |
| شناخت و طراحی مسیرهای ادبی                   | می‌توان مسیری که در سفرنامه‌های معروف □ همچون سفرنامه ناصر خسرو یا مارکوپولو نوشته شده است را بازسازی کرد یک تور گردشگری بر مبنای این سفرنامه و مسیرهای نام برده شده در آن راهاندازی کرد. | 39  |
| کارهای خلاق ادبی                             | از کارهای خلاقانه در زمینه گردشگری ادبی حمایت شود.                                                                                                                                        | 40  |
| ساخت مکان‌های ادبی اقتصادی                   | از مکان‌ها و منازل مطرح در روایت‌های ادبی برای توسعه تور گردشگری ادبی بهره‌گیری شود.                                                                                                      | 41  |
| آموزش و فرهنگ سازی                           | برای جذب کردن گردشگر ادبی هم نیاز به بستر سازی و هم دادن نگاهی جدید به گردشگران است                                                                                                       | 42  |
| حمایت از تحقیق و پژوهش                       | در حمایت از تحقیق و پژوهش درباره گردشگر ادبی نیاز به سرمایه‌گذاری است                                                                                                                     | 43  |
| بازسازی آرمگاه                               | بسیاری از مقبره‌های شعرا و ادبا باید بازسازی شود و تبلیغات گسترده‌تر و مدون‌تری برای آثار مرتبط با گردشگری ادبی ایجاد کنیم.                                                               | 44  |
| تبلیغ جاذبه‌های ادبی                         | موزه‌های مرتبط با این موضوع بسازیم.                                                                                                                                                       | 45  |
| موزه‌های ادبی                                | از حضور ادیبان و شاعران سود ببریم و جشنواره‌های ادبی بیشتری برگزار کنیم                                                                                                                   | 46  |
| جشنواره ادبی                                 | تدارک تورهای ادبی با برنامه‌های متنوع می‌تواند در توسعه و ترویج گردشگری ادبی مفید واقع گردد.                                                                                              | 47  |
| بسته‌های متنوع تور ادبی                      | تبلیغ و عرضه قابلیت‌های گردشگری ادبی ایران بر مبنای شناخت درست از بازار گردشگری ادبی انجام شود.                                                                                           | 48  |
| تبلیغ جاذبه‌های ادبی                         | شناخت بازار گردشگری ادبی                                                                                                                                                                  |     |
| شهر کتاب، برگزاری نمایشگاه و جشنواره گردشگری | توسعه شهر کتاب، برگزاری نمایشگاه و جشنواره گردشگری از اقداماتی است که به رونق گردشگری ادبی کمک می‌کند.                                                                                    | 49  |
| نمایشگاه ادبی                                | به برگزاری نمایشگاه ادبی و عرضه جذابیت‌های گردشگری ادبی با امکانات دیداری و شنیداری اقدام شود.                                                                                            | 50  |
| نقشه گردشگری ادبی                            | تهیه نقشه گردشگری ادبی برای دسترسی هرچه بهتر گردشگران به مکان رویدادها                                                                                                                    | 51  |
| حمایت از کمپین‌ها                            | حمایت از کمپین‌های فعال در تبلیغ و ترویج گردشگری ادبی                                                                                                                                     | 52  |
| حمایت از فعالیت بخش خصوصی                    | حمایت از مراکز بخش خصوصی فعال در تبلیغ و ترویج گردشگری ادبی                                                                                                                               | 53  |

|     |                                                                                                                                                                                                                               |                                        |
|-----|-------------------------------------------------------------------------------------------------------------------------------------------------------------------------------------------------------------------------------|----------------------------------------|
| 54  | گورستان ظهیرالدوله به عنوان مکانی خاطره انگیز برای تمام افرادی که به علم و ادب علاقه‌مند.                                                                                                                                     | گورستان های ادبی                       |
| 55  | خانه‌های کسانی مانند احمد شاملو، سیمین دانشور و سیمین بهبهانی را پیدا و ثبت و تبدیل به موزه کنیم                                                                                                                              | خانه نویسندگان                         |
| 56  | افزایش آگاهی مردم در ارتباط با زمینه های گردشگری ادبی                                                                                                                                                                         | آموزش و فرهنگ سازی                     |
| 57  | آگاهی بخشی عمومی و و بالابردن ظرفیت های اجتماعی گردشگری ادبی                                                                                                                                                                  | آموزش و فرهنگ سازی                     |
| 58  | بهره گیری از گورستان های محل دفن شخصیت های فرهنگی-ادبی برای توسعه گردشگری ادبی                                                                                                                                                | گورستان های ادبی                       |
| 59  | گردشگری ادبی در زبان پارسی تا چندماه گذشته جایگاهی در گوگل نداشت این درحالی است که با آغاز فعالیت همایش گردشگری ادبی، این کلید واژه به اینترنت راه پیدا کرد                                                                   | بهره گیری از اینترنت                   |
| 60  | همایش گردشگری ادبی: یکی از عوامل راهبردی برای ترویج و توسعه گردشگری ادبی                                                                                                                                                      | همایش گردشگری ادبی                     |
| 61  | در توسعه گردشگری ادبی باید به تنوع بازار گردشگری ادبی و بخش بندی گردشگران توجه داشت                                                                                                                                           | شناخت بازار گردشگری ادبی               |
| 62  | گردشگری ادبی نیازمند حمایت بخش دولتی و مشارکت بخش خصوصی است                                                                                                                                                                   | حمایت بخش دولتی<br>مشارکت بخش خصوصی    |
| 63  | توسعه گردشگری نیازمند تشکیلات نهادی و سازمانی مناسب است                                                                                                                                                                       | نهادهای                                |
| 64  | تبلیغات محیطی یکی از روش های مناسب برای ترویج گردشگری ادبی در جامعه است                                                                                                                                                       | تبلیغات محیطی                          |
| 65  | بازسازی و شناسایی مکان های مرتبط با زندگی شاعران، وجود خانه‌های ادبا و عالمان                                                                                                                                                 | مکان های زندگی<br>خانه نویسندگان       |
| 66  | راهکار توسعه گردشگری ادبی: بهره گیری از مکان های مرتبط با زندگی شاعران                                                                                                                                                        | مکان زندگی                             |
| 67  | راه اندازی آژانس های تخصصی در حوزه گردشگری ادبی                                                                                                                                                                               | آژانس های تخصصی                        |
| 68  | اطلاع رسانی و افزایش آشنایی مردم با چهره‌ها و مشاهیر کشور                                                                                                                                                                     | آموزش و فرهنگ سازی                     |
| 69  | برگزاری بزرگداشت برای هریک از شعرا و ادبیات کشور در شهرهایی که متولد یا زندگی کرده‌اند                                                                                                                                        | رویداد ادبی                            |
| 70  | برگزاری تور های ادبی توسط دفاتر خدمات مسافرتی و ورود آژانس داران به این حوزه                                                                                                                                                  | تور های ادبی<br>ورود آژانس های مسافرتی |
| 71  | صدور مجوز بند ب برای دانشجویان، اساتید و علاقه‌مندان به گردشگری ادبی خبر داد که به صورت تخصصی وارد تورگردانی گردشگری ادبی شوند                                                                                                | حمایت از فعالیت متخصصان                |
| 72  | کشورهای مختلف با استفاده از نام و نشان مشاهیر، شعرا و داستان نویسان خود و با بهره بردن از شهر، دیار و کاشانه آنها در صدد طراحی گردشگری به نام آن صاحب نام برآمدند و مسیر گردشگری برای آن تعریف کرده‌اند                       | مسیر گردشگری ادبی                      |
| 73  | توسعه گردشگری ادبی نیازمند سیاست های حمایتی از طریق نهادهای مسئول در کشور است                                                                                                                                                 | سیاست های حمایتی از طریق نهادهای مسئول |
| 74  | بازاریابی و بهره گیری از ظرفیت بازار گردشگری بین المللی برای توسعه گردشگری ادبی                                                                                                                                               | بازاریابی                              |
| 75  | می‌توان با انجام مطالعات علمی و شناخت کامل این حوزه، مسیرهای ویژه‌ای برای «گردشگری ادبی» تعریف کرد                                                                                                                            | مسیرهای ادبی                           |
| 76  | هدایا از برگزاری همایش «گردشگری ادبی» نیز احیای این نوع از جاذبه‌ها در حوزه گردشگری است.»                                                                                                                                     | همایش ادبی                             |
| 77  | سعدی و فردوسی و مولانا و همچنین خیام و عطار سفرهای بسیار داشتند و برای هر کدام از این شاعران و فیلسوفان می‌توان مسیر گردشگری تعریف کرد و به بهانه روز تولد و روز بزرگداشت آنها این مسیرها را معرفی و در صدد جذب گردشگر برآمد. | مسیر گردشگری<br>رویداد ادبی            |
| 78  | استراتژی ترویج و توسعه مسیرهای گردشگری ادبی را به کار گیریم.                                                                                                                                                                  | مسیرهای گردشگری ادبی                   |
| 79  | توسعه گردشگری ادبی نیازمند مطالعات شناختی و بسط مفهومی در سطح جامعه است                                                                                                                                                       | مطالعه و تحقیق<br>آموزش و فرهنگ سازی   |
| 80  | فعالیت در زمینه گردشگری ادبی نیازمند شناخت کافی است                                                                                                                                                                           | مطالعه و تحقیق                         |
| 81  | «تعریف مسیرهای» گردشگری ادبی» مهارت خاصی می‌خواهد که باید به صورت علمی تعریف شوند.                                                                                                                                            | مسیرهای ادبی                           |
| 82  | این نوع گردشگری نیازمند آموزش، و اطلاع رسانی در سطح جامعه است.                                                                                                                                                                | آموزش و فرهنگ سازی                     |
| 83  | با اجرای سیاست‌های تشویق کتابخوانی و علاقه عمومی به کتاب و ادبیات، توربسم ادبی سالانه نزدیک به یک میلیارد دلار درآمد ایجاد اقتصاد ملی آمریکا می‌کند.                                                                          | سیاست‌های تشویق عمومی                  |
| 84  | کسب درآمد از طریق گردشگری ادبی نیازمند بالابردن دانش ادبی در جامعه است                                                                                                                                                        | آموزش و فرهنگ سازی                     |
| 85  | گنجاندن کتابخوانی در برنامه ریزی اوقات فراغت برای جامعه می‌تواند به توسعه گردشگری ادبی کمک کند                                                                                                                                | سیاست‌های تشویق عمومی                  |
| 86  | اختصاص یک شبکه تلویزیونی به مباحث تخصصی و غیر تخصصی گردشگری در ایران.                                                                                                                                                         | آموزش و تبلیغ رسانه ای                 |
| 87  | معرفی جاذبه های گردشگری ادبی در کتاب های درسی و غیردرسی.                                                                                                                                                                      | آموزش و اطلاع رسانی                    |
| 88  | قصه نویسی برای کودکان و داستان و رمان برای نوجوانان و بزرگسالان با هدف معرفی نامحسوس جاذبه های ادبی کشور.                                                                                                                     | آموزش و فرهنگ سازی                     |
| 89  | حمایت و تشویق گردشگران به سفر نویسی                                                                                                                                                                                           | تشویق سفر نویسی                        |
| 90  | اختصاص برخی از برنامه های آموزشی مدارس و دانشگاه ها در فضاهای ادبی کشور در رشته های تحصیلی متعدد.                                                                                                                             | آموزش و فرهنگ سازی                     |
| 91  | بازسازی نمادین مسیرهای گردشگری مبتنی بر سفرنامه های تاریخی                                                                                                                                                                    | مسیرهای گردشگری                        |
| 92  | برپایی برنامه های ملی متنوع در اماکن ادبی                                                                                                                                                                                     | رویداد های ادبی                        |
| 93  | ساخت فیلم ها و سریال های تاریخی – ادبی                                                                                                                                                                                        | فیلم و سریال تلویزیونی                 |
| 94  | مرکز مطالعات کی پرگارد در دانشگاه کپنهاگ در دانمارک، با برگزاری صدها مراسم این شهر را به یکی از برترین شهرهای توربسم ادبی جهان مبدل کرد.                                                                                      | رویداد ادبی                            |
| 95  | گردشگری رویدادی: کنگره بین المللی شمس تبریزی در خوی در سال 1389 با حضور بیش از 40 بازیگر معروف از خانه سینما                                                                                                                  | رویداد ادبی                            |
| 96  | لزوم احیا و بازسازی برخی جاذبه های بالقوه گردشگری ادبی مانند رکن آباد در 12 ک.م شیراز                                                                                                                                         | به فعلیت درآوردن پتانسیل ها            |
| 97  | تور گردشگری ادبی یا محوریت یک کتاب                                                                                                                                                                                            | تور ادبی                               |
| 98  | نویسندگانی به مکان‌های واقعی در داستان‌های خود اشاره کرده‌اند و می‌توان براساس این نوشته‌ها تور طراحی کرد                                                                                                                     | مکان های ادبی<br>تور ادبی              |
| 99  | نخستین همایش دو روزه گردشگری ادبی غرب کشور توسط تشکل‌های غیردولتی در همدان                                                                                                                                                    | همایش گردشگری ادبی                     |
| 100 | ایجاد چارچوب قانونی برای حمایت از تشکلهای غیر دولتی فعال در زمینه گردشگری فرهنگی-ادبی                                                                                                                                         | حمایت از بخش خصوصی                     |
| 101 | بازشناسی و معرفی نام نقاطی که در متون ادبی مانند آثار عطار، شاهنامه فردوسی، کلیات سعدی، خمسه نظامی، مثنوی مولوی و صدها شاهکار ادبی دیگر این سرزمین آمده است                                                                   | بازشناسی و ساخت مکان های ادبی          |
| 102 | برگزاری همایش‌های ادبی و برپایی برنامه‌های ملی متنوع در اماکن ادبی یکی از راهکارهای جذب گردشگران ادبی است                                                                                                                     | همایش ادبی<br>رویداد ادبی              |
| 103 | ثبت خانه شاعران و نویسندگان و پژوهشگران ادبی در فهرست آثار ملی                                                                                                                                                                | ثبت ملی خانه نویسندگان                 |

|     |                                                                                                                                                                                                           |                               |
|-----|-----------------------------------------------------------------------------------------------------------------------------------------------------------------------------------------------------------|-------------------------------|
| 104 | تهیه نقشه ادبی، برنامه های ترویج کتابخوانی-                                                                                                                                                               | سیاست های تشویق عمومی         |
| 105 | خلاقیت های فردی در گردشگری ادبی نقش بسزایی دارد.                                                                                                                                                          | گردشگری خلاق                  |
| 106 | توسعه: نقش سینما و تلویزیون در توسعه گردشگری ادبی؛ نمونه اش سریال شهریار که باعث شد ر همان سال دیوان شهریار یکی از کتابهای پر فروش شود                                                                    | سینما و تلویزیون              |
| 107 | خانه های شاعران و نویسندگان مشهور حفظ و بازسازی شود.                                                                                                                                                      | خانه نویسندگان                |
| 108 | مسیر سفرنامه مارکوپولو در ایران برای می تواند برای گردشگران خارجی جذاب باشد.                                                                                                                              | مسیر ادبی                     |
| 109 | در پرتو شعار گفتگوی تمدنها به توسعه گردشگری ادبی پرداخته شود.                                                                                                                                             | شعار گفتگوی تمدنها            |
| 110 | ساخت سریال های ادبی برای معرفی فرهنگ و تمدن به دیگر کشورها                                                                                                                                                | فیلم                          |
| 111 | بزرگداشت های ادبی با مراسم ها و برنامه های متنوع و جذاب                                                                                                                                                   | رویداد بزرگداشت               |
| 112 | در حوزه گردشگری ادبی نیز سرمایه گذاری شود                                                                                                                                                                 | سرمایه گذاری                  |
| 113 | ثبت جهانی مکانهای گردشگری بر رونق گردشگری                                                                                                                                                                 | ثبت جهانی                     |
| 114 | تشویق به خاطره نویسی و سفر نویسی بیشتر در دنیای مجازی رونق داشته و به یاری گردشگری کشور های مختلف آمده است. راهکاری که ژاپن، استرالیا، ایالات متحده آمریکا و آلمان توانسته اند به خوبی از آن بهره مند شده | سیاست های تشویق عمومی         |
| 115 | استفاده از همین قدرت یعنی رسانه ها و دنیای مجازی تصویری واقعی و دقیق از ایران برای جهان مخابره کنیم                                                                                                       | فضای مجازی                    |
| 116 | بیشتر مترجه ان جی او ها و بخش خصوصی: ترویج و توسعه با نتیجه به شعار دولت یازدهم مبنی بر ترویج گردشگری                                                                                                     | حمایت از بخش خصوصی            |
| 117 | استفاده از تجربیات کشورها                                                                                                                                                                                 | الگوگیری از تجربه های موفق    |
| 118 | ارسال جوایزی نفیس از صنایع دستی ایران برای گردشگران خارجی که از طریق انتشار خاطرات سفر با انتشار این خاطرات مستند جلوی سم پاشی برخی از کشورها علیه جاذبه های کشور ایران را بگیرند                         | تتش ز دایی سیاسی              |
| 119 | تشویق گردشگران به نوشتن خاطراتشان در دنیای مجازی: ژاپن از جمله این کشورها است                                                                                                                             | سیاست های تشویق عمومی         |
| 120 | انس و الفت تاریخی ایرانیان با ادبیات فارسی و حضور ادبیات در همه ساحات فرهنگی مردم این سرزمین، ظرفیت خوبی را برای توسعه گردشگری ادبی به وجود می آورد                                                       | بهره گیری پتانسیل های فرهنگی  |
| 121 | ضرورت توجه به اسطوره ها و افسانه ها در توسعه گردشگری                                                                                                                                                      | اسطوره ها و افسانه ها         |
| 122 | تعریف مسیر برای «گردشگری ادبی» نیازمند انجام تحقیقات علمی، تعریف مفاهیم پایه ای و احیای هویت تاریخی است                                                                                                   | مسیرهای ادبی پژوهش            |
| 123 | صدور مجاز گردشگری ادبی برای دانشجویان و استادان علاقمند به فعالیت در این حوزه                                                                                                                             | حمایت از فعالیت متخصصان       |
| 124 | اهمیت اقتصادی: نمونه های موفق                                                                                                                                                                             | الگوگیری از تجربه های موفق    |
| 125 | فرهنگ سازی و ترویج کتابخوانی: یکی از ارزش های رایج میان بسیاری از مردم آمریکا این است که با کتاب های مورد علاقه شان برای گذراندن تعطیلات تابستانی به سواحل آفتابی و مناطق خوش آب و هوا می روند            | آموزش و فرهنگ سازی            |
| 126 | توسعه: گنجاندن گردشگری ادبی در پکیج گردشگری تفریحی                                                                                                                                                        | پیسته ترکیبی تور گردشگری      |
| 127 | استخراج مکانهای اشاره شده در ادبیات و برنامه ریزی جهت تبدیل آنها به جاذبه های ادبی                                                                                                                        | مکان های ادبی                 |
| 128 | طراحی بناهای ادبی متناسب حال و هوای شخصیت و شعر آنها                                                                                                                                                      | طراحی مکان های ادبی           |
| 129 | خانه ی پروین اعتصامی در تبریز و تهران می تواند مقاصد اولیه ی این گردشگری ادبی باش                                                                                                                         | خانه نویسندگان                |
| 130 | تعیین نقشه گردشگری برای هر شاعر                                                                                                                                                                           | نقشه گردشگری ادبی             |
| 131 | استفاده از ظرفیت افسانه های محلی و بومی و بازسازی مکان با الهام از آنها                                                                                                                                   | افسانه های محلی و بومی        |
| 132 | بازسازی مسیرهایی که توسط مشاهیر طی شده است                                                                                                                                                                | مسیرهای ادبی                  |
| 133 | توسعه زیرساخت های لازم                                                                                                                                                                                    | زیرساخت ها                    |
| 134 | حفظ اصالت خانه شاعران؛ مثل خانه شاملو                                                                                                                                                                     | خانه نویسندگان                |
| 135 | برگزاری نشست تخصصی بررسی فرصت های گردشگری ادبی ایران به مناسبت سالروز بزرگداشت مقام حافظ شیرازی                                                                                                           | رخداد ادبی                    |
| 136 | تنوع بخشی به برنامه های تورهای ادبی برای بالابردن جذابیت آنها                                                                                                                                             | تنوع بخشی به تور های ادبی     |
| 137 | در فرانسه تنها سنگ قبر ویکتور هوگو را نمی بینید. بلکه در فضایی نفس می کشید که هوگو در آن زندگی کرده، نوشته، قلم به دست گرفته و ... کتابی را می بینید که دوست داشته و خوانده                               | فضاهای ادبی                   |
| 138 | مقبره نمادین برای شیرین و فرهاد بسازیم                                                                                                                                                                    | مکان های ساختگی               |
| 139 | تراژدی این عشاق را برای گردشگران یادآوری کنیم                                                                                                                                                             | افسانه ها                     |
| 140 | توجه به روایتها و افسانه های ملی و ساختن جاذبه های گردشگری در مکانهایی که ردیابی از این افسانه در آنجا وجود دارد                                                                                          | افسانه های ادبی               |
| 141 | توجه به مکانهای متعددی که نام آنها برگرفته از قصه ها و افسانه ایرانی است و احیاء آنها به عنوان جاذبه گردشگری                                                                                              | مکان های ادبی                 |
| 142 | بسیاری از مقبره های شعرا و ادبا باید بازسازی شود                                                                                                                                                          | بازسازی آرامگاه               |
| 143 | تبلیغات گسترده تر و مدون تری برای آثار مرتبط با گردشگری ادبی ایجاد کنیم                                                                                                                                   | تبلیغ و اطلاع رسانی           |
| 144 | به معرفی مفاخر علمی، ادبی و هنری معاصر به جوانان                                                                                                                                                          | آموزش و اطلاع رسانی           |
| 145 | توسعه: لزوم ابتکار و خلاقیت و آشنایی با شیوه های تازه گردشگری ادبی                                                                                                                                        | خلاقیت                        |
| 146 | شاید فیلم «هامون» از جمله نمونه هایی باشد که در ایران ساخته شد و آن زمان موجی از سفر جوانان به شهر کاشان را به وجود آورد                                                                                  | فیلم                          |
| 147 | ساخت فیلم «خیلی دور، خیلی نزدیک» هم دیده و سبب شد تورهایی به مقصد کویرهای خور و بیابانک                                                                                                                   | فیلم                          |
| 148 | ترویج و توسعه: ساخت موزه ها و شهرک های ادبی برای آثار فاخری مثل شاهنامه                                                                                                                                   | مکان ادبی                     |
| 149 | برگزاری کارگاه آموزشی گردشگری ادبی در ایران                                                                                                                                                               | آموزش                         |
| 150 | هر گونه توسعه ای از جمله در حوزه توسعه فرهنگی نیاز بسترها و زیرساخت ها مناسب است.                                                                                                                         | زیرساخت ها و امکانات          |
| 151 | توسعه و ترویج گردشگری ادبی نیازمند تعاملات سازنده در سطح بین المللی و ملی است.                                                                                                                            | تعامل و همکاری                |
| 152 | مکان هایی ادبی بر اساس شرح روایت های ادبی ساخته شود.                                                                                                                                                      | ساخت مکان های ادبی اقتباسی    |
| 153 | می توان پتانسیل های فراوان میراث ادبی غنی ایران برای رونق بخشی به گردشگری استفاده کرد.                                                                                                                    | بهره گیری از انواع پتانسیل ها |
| 154 | بخش فرهنگ در ایران نیازمند نیازمند مدیرانی فرهیخته است که قدر و جایگاه میراث ادبی کشور را می شناسند.                                                                                                      | ارج نهادن به میراث ادبی       |
| 155 | بسیاری از آرامگاه های نویسندگان از جذابیت لازم برخوردار نیستند و نیازمند معماری جذاب تری هستند                                                                                                            | بازسازی آرامگاه               |
| 156 | ما باید از تجربه های کشور های موفق بویژه شهر های خلاق ادبی یونسکو بهره گیری کنیم                                                                                                                          | الگوگیری از تجربه های موفق    |
| 157 | تعیین نقشه گردشگری برای هر یک از مشاهیر ادبی لازم است.                                                                                                                                                    | نقشه گردشگری ادبی             |
| 158 | یادمان های نمادین برای شاعران و نویسندگانی که در محدوده جغرافیایی ایران نیستند یا مدفن آن ها مشخص نیست بسازیم.                                                                                            | مکان های ساختگی               |
| 159 | توسعه گردشگری فرهنگی- ادبی نیازمند نهادهای کارآمد است.                                                                                                                                                    | تهادسازی                      |

|     |                                                                                                                                                   |                                   |
|-----|---------------------------------------------------------------------------------------------------------------------------------------------------|-----------------------------------|
| 160 | حوزه بازاریابی در بخش گردشگری نیازمند رویکرد خلاق است.                                                                                            | بازاریابی                         |
| 161 | می توان پتانسیل های فراوان میراث ادبی غنی ایران برای رونق بخشی به گردشگری استفاده کرد.                                                            | بهره گیری از انواع پتانسیل ها     |
| 162 | به برگزاری نمایشگاه های بین المللی کتاب با رویکرد تخصصی به حوزه ادبیات می تواند در این زمینه تحول آفرین باشد.                                     | نمایشگاه ادبی                     |
| 163 | متولیان بخش فرهنگی و میراث تاریخی کشور می توانند در فضاهای شهری نوآوری و خلاقیت به خرج دهند.                                                      | تبلیغات محیطی                     |
| 164 | از داستان های عامیانه و میراث شفاهی خرده فرهنگ های محلی برای ساخت مکان ها یا جاذبه های ادبی بهره گیری گردد.                                       | فرهنگ عامه                        |
| 165 | خانه سعدی واقع در بافت تاریخی شیراز باید حفظ شود، این خانه می تواند زمینه ساز گردشگری ادبی در شهر شیراز باشد و به بافت تاریخی هویت دوباره ای دهد. | بازسازی و حفاظت از خانه نویسندگان |

**Table S3.** Challenges to the Development of Literary Tourism in Iran (the translation of Table S1 into English).

|    |                                                                                                                                                                                                                                                                 |
|----|-----------------------------------------------------------------------------------------------------------------------------------------------------------------------------------------------------------------------------------------------------------------|
| 1  | Literary cities of Iran - for example, Shiraz - do not have a significant place among the literary tourism destinations of the world.                                                                                                                           |
| 2  | The government does not support holding "literary tourism" international conferences and events.                                                                                                                                                                |
| 3  | The houses and properties of many literary figures are either destroyed or, if anything remains, neglected.                                                                                                                                                     |
| 4  | Little attention to the country's literary heritage has had negative and irreparable consequences.                                                                                                                                                              |
| 5  | Many capacities of literary tourism in Iran are still unknown.                                                                                                                                                                                                  |
| 6  | Not having a proper strategy in relation to the heritage of famous poets of Persian literature such as Nizami and Rumi whose tomb is in neighboring countries- respectively in Azerbaijan and Turkey- is one of the current issues of literary tourism in Iran. |
| 7  | In the context of the confiscation of Iran's cultural heritage, the main criticism is our own behavior, And we do not make a significant effort to introduce the greatness of Persian literature to the world.                                                  |
| 8  | For the lovers of Iran's culture and literature, it is an obvious problem to pay little attention or even neglect to the heritage of the country's literary figures.                                                                                            |
| 9  | Indifference in introducing the famous writers of Persian literature to the people of the world can be seen clearly.                                                                                                                                            |
| 10 | Legal and judicial problems after the death of contemporary writers- that arising from inheritance related issues- make it difficult to protect and maintain these places as national heritage.                                                                 |
| 11 | Lack of attention to the protection of the literary heritage of the country has led to the loss of the authenticity of many literary places.                                                                                                                    |
| 12 | In general, there is no proper understanding of literary tourism in Iran, and it is mostly limited to visiting poets and writer's shrines.                                                                                                                      |
| 13 | We do not pay attention to our literature while our literature has been a source of inspiration for world literature.                                                                                                                                           |
| 14 | The potentials of literary heritage are not properly used in the field of literary tourism development                                                                                                                                                          |
| 15 | Literary heritage and creative literary tourism are not used to promote the cultural identity of cities.                                                                                                                                                        |
| 16 | The presence of real places in the works of Iranian writers is rare.                                                                                                                                                                                            |
| 17 | Our fictional literature takes place in no place and no time.                                                                                                                                                                                                   |
| 18 | The imaginative and surrealistic features of Iranian literary works prevail over its realistic aspects, so the presence of real places in these works is weak.                                                                                                  |
| 19 | Neglecting the potential of literary heritage is a common problem in the management of the cultural sector.                                                                                                                                                     |
| 20 | Many houses of writers that had the ability to become a place of literary tourism have been completely destroyed.                                                                                                                                               |
| 21 | Our cities suffer from lack of identity while many literary places remain unknown.                                                                                                                                                                              |
| 22 | One of the obvious challenges of the development of cultural and literary tourism in Iran is the fact that the material heritage in this field remains unknown.                                                                                                 |
| 23 | Travelogues, like Nasser Khosrow's Safarnama, can inspire the design of literary tours, but this is not the case.                                                                                                                                               |
| 24 | There is no significant approach to introduce the famous authors of Persian literature to the people of the world.                                                                                                                                              |
| 25 | With all these weaknesses, how can we expect cultural and literary tourism to flourish in our country?                                                                                                                                                          |
| 26 | So far, the managers of the tourism sector have acted very poorly in promoting and offering Iran's literary tourism capabilities to the tourism market.                                                                                                         |
| 27 | The lack of familiarity of the managers and officials of the country's tourism sector with literary tourism is one of the fundamental problems in this field                                                                                                    |
| 28 | The inefficiency of responsible institutions in the field of culture is one of the serious challenges of literary tourism.                                                                                                                                      |
| 29 | Reluctance in the public sector to support the development of literary tourism is evident.                                                                                                                                                                      |
| 30 | Currently, we do not have a specific and well-known form of tourism called "literary tourism" in Iran.                                                                                                                                                          |
| 31 | Until now, the urban management system in Iran has not paid attention to the development of literary tourism.                                                                                                                                                   |
| 32 | The design of literary routes in relation to the places of life and literary activity of writers has not been considered.                                                                                                                                       |
| 33 | Defining the route for "literary tourism" is not possible without valid and original research.                                                                                                                                                                  |
| 34 | What currently makes it difficult to work in the field of literary tourism is the lack of proper knowledge and lack of creativity in this regard.                                                                                                               |
| 35 | Considering the very high potentials of literary tourism in Iran, our share of income from literary tourism is insignificant.                                                                                                                                   |
| 36 | In general, Iran does not have a significant position in the tourism sector of the world, let alone literary tourism.                                                                                                                                           |
| 37 | The house of some writers, like Sadegh Hedayat (1903-1951), has turned into a kindergarten due to the neglect of cultural authorities.                                                                                                                          |
| 38 | The obvious capacities of literary tourism have been neglected in different provinces of Iran.                                                                                                                                                                  |
| 39 | We have neither defined literary paths nor introduced literary attractions to the society.                                                                                                                                                                      |
| 40 | A country whose biggest cultural capital is literature, It has not yet been able to introduce its literary assets and attractions to tourists.                                                                                                                  |
| 41 | Except for the culturally rich tombs, no other model of literary tourism has been presented in Iran.                                                                                                                                                            |
| 42 | According to the experts, the authorities' failure to protect the country's cultural and literary heritage is noticeable.                                                                                                                                       |

|    |                                                                                                                                                                                                                                                                                                                                        |
|----|----------------------------------------------------------------------------------------------------------------------------------------------------------------------------------------------------------------------------------------------------------------------------------------------------------------------------------------|
| 43 | Destruction of cultural heritage and literary houses by land and real estate brokers is worrying.                                                                                                                                                                                                                                      |
| 44 | Officials use slogans in dealing with cultural and literary tourism, and pragmatism is not observed in this field.                                                                                                                                                                                                                     |
| 45 | The public's lack of knowledge about cultural and literary heritage is known as a serious obstacle to the development of literary tourism.                                                                                                                                                                                             |
| 46 | This level of indifference of cultural authorities to literary tourism in the country is disappointing.                                                                                                                                                                                                                                |
| 47 | So far, not even a literary museum worthy of attention has been built in Iran.                                                                                                                                                                                                                                                         |
| 48 | Many people involved in the literary tourism industry relate the main reason for the lack of success of this field in Iran to the lack of cultural tourism in real, imaginary or even fake places.                                                                                                                                     |
| 49 | There is no targeted approach to foster literary talent and creativity as a stimulus for the development of literary tourism                                                                                                                                                                                                           |
| 50 | So far, no significant investment has been made in the field of literary tourism.                                                                                                                                                                                                                                                      |
| 51 | Negative propaganda against Iran and making it look unsafe is one of the important obstacles to attracting foreign tourists in Iran.                                                                                                                                                                                                   |
| 52 | So far, the increasing capacities of virtual space have not been purposefully used to introduce Iran's tourist attractions.                                                                                                                                                                                                            |
| 53 | Literary tourism is limited to some cities, such as Shiraz, and other literary attractions in other cities and villages are not well known.                                                                                                                                                                                            |
| 54 | Most of what happens in Shiraz is not literary tourism in its modern sense, but visiting the graves and tombs of writers.                                                                                                                                                                                                              |
| 55 | Limiting literary tourism to a few cities and neglecting the literary attraction of other geographical areas is known as one of the important issues of literary tourism.                                                                                                                                                              |
| 56 | In the field of literary and cultural tourism, some countries make everything out of nothing, but in our country, the rich heritage and existing properties are not exploited.                                                                                                                                                         |
| 57 | Cultural-literary tourism tours in Iran are not attractive and professional.                                                                                                                                                                                                                                                           |
| 58 | Neglecting the great capacity of legends and national myths is one of the problems of literary tourism development.                                                                                                                                                                                                                    |
| 59 | Many words have been said by the authorities about literary tourism, but no positive changes have been made in this field.                                                                                                                                                                                                             |
| 60 | s long as neglecting and not taking advantage of the assets of literary heritage continues, Literary tourism will not prosper either.                                                                                                                                                                                                  |
| 61 | Holding literary festivals is one of the activities related to this type of tourism, which has not been done so far.                                                                                                                                                                                                                   |
| 62 | The inability to protect the literary heritage is one of the major obstacles to literary tourism in the country.                                                                                                                                                                                                                       |
| 63 | Literary monuments built in Iran do not have great splendor and attractiveness.                                                                                                                                                                                                                                                        |
| 64 | Some monuments and literary places built in Iran do not have an attractive design.                                                                                                                                                                                                                                                     |
| 65 | In Iran, tourism based on historical sites dominates other forms of cultural and literary tourism.                                                                                                                                                                                                                                     |
| 66 | There are few facilities for receiving literary tourists.                                                                                                                                                                                                                                                                              |
| 67 | Unfortunately, our literary tourism is limited to visiting soulless tombs.                                                                                                                                                                                                                                                             |
| 68 | Those interested in the heritage of Persian literature from Iran and all over the world go to Turkey to participate in the events related to the literary heritage of Mevlânâ (1207-1273) in Konya city, while the cultural authorities of the country do not pay attention to the literary creative activities about this great poet. |
| 69 | Here, literary tourism is only a visit to the tombs of poets and writers!                                                                                                                                                                                                                                                              |
| 70 | There is no information about the house of Sohrab Sepehri in Kashan city, which has a wide reflection in his poetry and works of art. [Famous contemporary poet and painter of Iran (1928-1980)].                                                                                                                                      |
| 71 | Apart from visiting the tombs of writers, we have not been able to offer other forms of literary tourism to literary tourists.                                                                                                                                                                                                         |
| 72 | Still, the country's cultural managers have not believed in the potential of literary tourism.                                                                                                                                                                                                                                         |
| 73 | Cultural heritage officials of the country are less criticized for their weakness in protecting literary attractions.                                                                                                                                                                                                                  |
| 74 | The attractions of contemporary literary tourism and the legacy left by contemporary writers have always been met with indifference.                                                                                                                                                                                                   |
| 75 | We have never taken the trouble to build a museum worthy of Iranian literature                                                                                                                                                                                                                                                         |
| 76 | Literary tourism and its importance have not yet been realized for the cultural officials and managers of the country.                                                                                                                                                                                                                 |
| 77 | The lack of a strategy to socialize literature is one of the obstacles to the growth of literary tourism in the country.                                                                                                                                                                                                               |
| 78 | The lack of creativity in the field of literary tourism is one of the reasons for its lack of prosperity.                                                                                                                                                                                                                              |
| 79 | A militant atmosphere with parts of Iran's history and culture can be seen in the thinking of some executive officials.                                                                                                                                                                                                                |
| 80 | The negative attitude towards a part of Iran's history and culture has caused neglect of their surviving heritage.                                                                                                                                                                                                                     |
| 81 | We have failed to preserve the authenticity of many places of literary tourism                                                                                                                                                                                                                                                         |
| 82 | Compared to the cinema of other countries, Iranian cinema is weak in showing Iran in a way that attracts tourists.                                                                                                                                                                                                                     |
| 83 | Iranians are very proud about the culture of their ancestors, but in practice they do not show a broad will to support and protect the country's cultural heritage.                                                                                                                                                                    |
| 84 | We chant more, and we don't deal with pragmatism in the field of creative cultural and literary tourism.                                                                                                                                                                                                                               |
| 85 | The capacities of literary tourism as a very important branch of cultural tourism in Iran have remained neglected.                                                                                                                                                                                                                     |



|    |                                                                                                                                              |
|----|----------------------------------------------------------------------------------------------------------------------------------------------|
| 86 | The current understanding of literary tourism is often limited to visiting the monuments and tombs of writers.                               |
| 87 | The existing obstacles to the development of the tourism sector in Iran can be extended to the cultural and literary tourism branch as well. |
| 88 | The managerial inefficiency of the country's cultural organizations is not seriously challenged.                                             |

**Table S4.** Strategies for the development and promotion of literary tourism in Iran (the translation of Table S2 into English).

|    |                                                                                                                                                                                                  |
|----|--------------------------------------------------------------------------------------------------------------------------------------------------------------------------------------------------|
| 1  | Preparation of tourism maps for famous novels such as Klidar, by Mahmoud Daulatabadi                                                                                                             |
| 2  | Financial support of the government for holding international conferences and events in the field of "literary tourism"                                                                          |
| 3  | Taking advantage of the many potentials of Iranian literature for the prosperity of literary tourism                                                                                             |
| 4  | Designing literary tourism routes in the country                                                                                                                                                 |
| 5  | Performing various literary performances such as Shahnameh retellings for literary tourists                                                                                                      |
| 6  | Adaptation of literary works for the design and construction of literary tourism places (literary attraction)                                                                                    |
| 7  | Providing facilities to tourism professionals to work in the field of literary tourism (such as a license to establish specialized agencies)                                                     |
| 8  | In our country, rich literary resources such as Ferdowsi's Shahnameh can be a symbol for the development of literary tourism                                                                     |
| 9  | In our country, rich literary resources such as Ferdowsi's Shahnameh can be a symbol for the development of literary tourism                                                                     |
| 10 | Honoring all kinds of literary heritage of writers and poets                                                                                                                                     |
| 11 | lasting literary figures, and their works to be used for the development of literary tourism                                                                                                     |
| 12 | Supporting the implementation of literary tours to increase people's knowledge of writers and literary tourism attractions                                                                       |
| 13 | Introduction of literary tourism routes based on literary texts such as Nizami Ganjavi's works                                                                                                   |
| 14 | Using literary narratives to create and build a literary place                                                                                                                                   |
| 15 | Exploitation of literary narratives to produce literary attraction                                                                                                                               |
| 16 | Utilizing the capacities of literary heritage to design the literary travel route, the architecture of tourist places and artistic performances                                                  |
| 17 | Locating literary attractions based on literary narratives in literary works                                                                                                                     |
| 18 | Identifying literary places and routes                                                                                                                                                           |
| 19 | Using appropriate strategies in the protection and safeguarding of literary heritage                                                                                                             |
| 20 | Adaptation of literary works for artistic performances in the form of a literary tour                                                                                                            |
| 21 | Promotion, marketing and implementation of literary tours with the help of the Internet                                                                                                          |
| 22 | Diversification of literary tour programs should be considered to increase their attractiveness.                                                                                                 |
| 23 | It is necessary to recognize the various capacities of literary tourism and invest in this field.                                                                                                |
| 24 | The successful experiences of other countries in the world should be used for the development of literary tourism.                                                                               |
| 25 | By organizing all kinds of literary events, we will try to introduce our writers and poets to the world.                                                                                         |
| 26 | Protection of cultural and literary heritage through institutional consensus and collective participation should be included in the work of planners.                                            |
| 27 | One of the ways of diversifying the literary tour packages is to do things like "Mathnavi-khani" and "Literature reading in nature."                                                             |
| 28 | Writers' houses should become a literary tourism attraction (such as a literary museum).                                                                                                         |
| 29 | Development and promotion of literary tourism should be done by using the capabilities of the place and the place of creation of literary works.                                                 |
| 30 | The training of specialized guides for literary tourism tours should be considered.                                                                                                              |
| 31 | Stories of popular culture (folklore) should be used to build places or literary attractions                                                                                                     |
| 32 | Literary places should be built based on the description of literary narratives.                                                                                                                 |
| 33 | The diverse capacities of Iran's fictional and epic literature should be used to boost literary tourism.                                                                                         |
| 34 | Thousands of poets and writers have lived in this country, whose houses and tombs can be a meeting place for those interested in literature and tourism.                                         |
| 35 | Holding literary festivals is another activity related to this tourism.                                                                                                                          |
| 36 | Iran's prose and verse literature should be used to boost literary tourism                                                                                                                       |
| 37 | We must organize and make the necessary foundations to realize the existing potentials in Iran, and as a result, the position and importance of our literary tourism will be better represented. |
| 38 | It is necessary to actualize the talents and potentials in the literary heritage.                                                                                                                |
| 39 | Literary tourism in its new concept is linked with creative initiatives and this approach can help the development of literary tourism in Iran                                                   |
| 40 | It is possible to reconstruct the route written in famous travelogues and plan literary tours based on this.                                                                                     |
| 41 | Support creative works in the field of literary tourism.                                                                                                                                         |
| 42 | The places and houses mentioned in literary narratives should be used for the development of literary tourism.                                                                                   |
| 43 | In order to attract literary tourists, it is necessary to create a platform and give tourists a new perspective.                                                                                 |
| 44 | There is a need to invest in supporting research on literary tourism.                                                                                                                            |

|    |                                                                                                                                                                      |
|----|----------------------------------------------------------------------------------------------------------------------------------------------------------------------|
| 45 | Many tombs of poets and writers should be restored and we should create wider and well-documented advertisements for works related to literary tourism.              |
| 46 | The rich heritage of Persian literature can be used to build a variety of literary museums.                                                                          |
| 47 | To provide the opportunity for the presence of writers and poets in the country from all over the world and organize more literary events                            |
| 48 | Preparing various literary tour packages can help to develop and promote literary tourism.                                                                           |
| 49 | The promotion and supply of Iran's literary tourism capabilities should be done based on the correct understanding of the literary tourism market.                   |
| 50 | The development of the city of books, the holding of exhibitions and tourism festivals are among the measures that contribute to the prosperity of literary tourism. |
| 51 | It is necessary to hold literary exhibitions and offer literary tourism products in this way.                                                                        |
| 52 | Preparation of literary tourism map for better access of tourists to literary attractions                                                                            |
| 53 | Supporting campaigns active in advertising and promoting literary tourism                                                                                            |
| 54 | Zahir al-Doulah cemetery is a memorable place for all people who are interested in culture and literature.                                                           |
| 55 | Turn the houses of contemporary writers such as Ahmed Shamlou, Simin Daneshvar and Simin Behbahani into literary museums                                             |
| 56 | Developing policies and programs for the socialization of literature                                                                                                 |
| 57 | Raising the literary knowledge of the people, in order to improve the social capacities of literary tourism                                                          |
| 58 | Using the cemeteries where cultural-literary figures are buried for the development of literary tourism                                                              |
| 59 | Today, the Internet and virtual social networks can accelerate the promotion and development of the literary tourism development discourse.                          |
| 60 | To promote and develop literary tourism, special attention should be paid to literary conferences and events.                                                        |
| 61 | In the development of literary tourism, attention should be paid to the diversity of the literary tourism market and the segmentation of tourists                    |
| 62 | Literary tourism requires the support of the public sector and the participation of the private sector                                                               |
| 63 | Tourism development requires appropriate institutional and organizational arrangements                                                                               |
| 64 | Environmental advertising is one of the appropriate methods to promote literary tourism in society                                                                   |
| 65 | Reconstruction and identification of places related to the lives of poets, the existence of houses of writers and scholars                                           |
| 66 | Literary tourism development strategy: using places related to poets' lives                                                                                          |
| 67 | Setting up specialized agencies in the field of literary tourism                                                                                                     |
| 68 | Informing and increasing people's familiarity with writers and literary figures of the country                                                                       |
| 69 | Holding a commemoration for each of the country's poets and writers in the cities where they were born or lived                                                      |
| 70 | Facilitate the conditions of activities of tourism agencies in the field of literary tours.                                                                          |
| 71 | Support the activities of skilled and expert people in the field of cultural and literary tourism.                                                                   |
| 72 | The literary geography of every writer and poet can be a source of creativity and innovation in literary tourism                                                     |
| 73 | The development of literary tourism requires supportive policies from the responsible institutions in the country                                                    |
| 74 | Marketing and taking advantage of the capacity of the international tourism market for the development of literary tourism                                           |
| 75 | The design of literary routes requires original and valid research projects                                                                                          |
| 76 | Holding literary events can help to interact and exchange ideas in the field of literary tourism.                                                                    |
| 77 | The lives of famous writers and poets and their literary geography can be a source of inspiration and creation of new ideas for the development of literary tourism. |
| 78 | We will use the strategy of promotion and development of literary tourism routes.                                                                                    |
| 79 | The development of literary tourism requires social support and people's participation.                                                                              |
| 80 | Activities in the field of literary tourism require promotional programs and specialized training courses.                                                           |
| 81 | "Designing literary tourism routes" depends on specialized knowledge and skills.                                                                                     |
| 82 | This type of tourism requires education and information at the community level.                                                                                      |
| 83 | Encouraging and persuading different social groups to study literary works can improve the social capacities of tourism development                                  |
| 84 | Earning money through literary tourism requires increasing specialized knowledge and public awareness.                                                               |
| 85 | Continuous holding of book reading competition can help the development of literary tourism                                                                          |
| 86 | Production and broadcast of documentary works and cultural programs through visual media such as television help to socialize literature.                            |
| 87 | The introduction of literary tourism attractions in students' textbooks can be considered a basic measure in this field.                                             |
| 88 | Developing policies and programs to promote reading at the level of children and young people                                                                        |
| 89 | Supporting and encouraging tourists to participate in travel writing programs                                                                                        |
| 90 | Organizing cultural and educational programs in literary places                                                                                                      |
| 91 | Using the content of historical travelogues to design literary routes                                                                                                |

|     |                                                                                                                                                                                           |
|-----|-------------------------------------------------------------------------------------------------------------------------------------------------------------------------------------------|
| 92  | Establishment of various national programs in literary places                                                                                                                             |
| 93  | Supporting the production of television series and movies based on literary works                                                                                                         |
| 94  | Supporting creative ideas to diversify literary events                                                                                                                                    |
| 95  | Holding literary events with the participation of domestic and foreign writers and intellectuals                                                                                          |
| 96  | Famous places in literary works can become tourist attractions                                                                                                                            |
| 97  | Any literary work can be the basis of designing a literary tour package                                                                                                                   |
| 98  | Locations reflected in literary works, television series and movies are attractive places for literary tourists                                                                           |
| 99  | Experience has shown that literary events have tangible achievements for the development of literary tourism                                                                              |
| 100 | Creating a legal framework to support non-governmental organizations that are active in the field of cultural-literary tourism                                                            |
| 101 | Recognizing and introducing places mentioned in literary texts                                                                                                                            |
| 102 | Holding literary events in literary places can be a very attractive idea.                                                                                                                 |
| 103 | It is necessary to register the houses of poets, writers and literary researchers in the national heritage list.                                                                          |
| 104 | Promotion of reading programs can play a significant role in the social promotion of literature.                                                                                          |
| 105 | Individual creativity should be supported in the development of literary tourism.                                                                                                         |
| 106 | Producing serials about writers' lives can help boost literary tourism. The TV series about the life of contemporary poet Shahriar [1907-1988] was a successful experience in this field. |
| 107 | The houses of famous poets and writers should be preserved and restored. These places can be very attractive for literary tourists.                                                       |
| 108 | The narratives in Marco Polo's travelogue about Iran can be attractive to foreign tourists.                                                                                               |
| 109 | It is possible to help the development of literary tourism in Iran through cooperation and interaction with the UNESCO Creative Literary Cities network.                                  |
| 110 | The production of television series based on literature can help to develop and promote literary tourism.                                                                                 |
| 111 | Holding events to honor writers and poets in their birthplaces                                                                                                                            |
| 112 | Literary tourism requires budget and investment.                                                                                                                                          |
| 113 | Parts of Iran's literary heritage are very valuable and can be registered in the World Heritage List.                                                                                     |
| 114 | Documenting travel experiences by literary tourists should be supported and incentive packages can be considered in this context.                                                         |
| 115 | Internet space can be used to show Iran's cultural and literary attractions to the people of the world.                                                                                   |
| 116 | The establishment of non-governmental organizations in the field of culture and literature contributes to the prosperity of literary tourism.                                             |
| 117 | Taking advantage of other countries' successful experiences in the field of literary tourism can be very useful.                                                                          |
| 118 | Allocating valuable literary awards with the participation of domestic and foreign writers can be considered a valuable action.                                                           |
| 119 | Literary tourists should be encouraged to write their memories on the Internet.                                                                                                           |
| 120 | The prominent role of literature in the cultural characteristics of Iranian people creates a good capacity for the development of literary tourism.                                       |
| 121 | National and local myths and legends have a great capacity for the development of literary tourism.                                                                                       |
| 122 | The development of literary tourism requires scientific and research support.                                                                                                             |
| 123 | Professional and skilled people should be supported to work in the field of literary tourism.                                                                                             |
| 124 | We should benefit from the experiences of creative literary cities.                                                                                                                       |
| 125 | Promoting studying literary works can lead to education and culture-building in the field of literary tourism.                                                                            |
| 126 | Combining literary tours with entertainment tours can be attractive for many tourists.                                                                                                    |
| 127 | Recognizing places mentioned in literature and planning to turn them into literary attractions                                                                                            |
| 128 | Taking inspiration from literary works to build literary places can include creative and attractive ideas for tourists.                                                                   |
| 129 | Most of the tourists interested in the field of literature tend to visit the houses where the famous writers live.                                                                        |
| 130 | A specific literary map can be prepared for each writer or poet.                                                                                                                          |
| 131 | Taking inspiration from local legends to create literary attractions and events is a very interesting idea.                                                                               |
| 132 | Many literary routes can be redesigned in the context of literary geography.                                                                                                              |
| 133 | Accommodating literary tourists requires comfortable facilities and proper infrastructure.                                                                                                |
| 134 | Protecting the authenticity of literary places is very important for literature enthusiasts.                                                                                              |
| 135 | It is very important to set up discussion sessions about the links between economy, culture and literary tourism along with literary events.                                              |
| 136 | Diverse and multipurpose literary tours can be an attractive option for tourists.                                                                                                         |
| 137 | Different writers create different spaces in their works, this is a point that should be taken into consideration in the development of literary tourism.                                 |
| 138 | Experience has shown that tourists are very interested in the construction of monuments and symbolic places based on legends and myths.                                                   |
| 139 | Creating iconic locations for famous lovers in fiction can be very appealing to people.                                                                                                   |

|     |                                                                                                                                                                                                       |
|-----|-------------------------------------------------------------------------------------------------------------------------------------------------------------------------------------------------------|
| 140 | Establishing a link between geography and creativity in literary tourism is inevitable.                                                                                                               |
| 141 | Places whose names are derived from legends are suitable options for the development of creative literary tourism.                                                                                    |
| 142 | It seems that many tombs of poets and writers need restoration.                                                                                                                                       |
| 143 | The development of any form of tourism, including literary tourism, requires a proper marketing strategy.                                                                                             |
| 144 | In the development of literary tourism, it is very important to pay attention to different population groups, especially the youth.                                                                   |
| 145 | Continuous innovation and creativity is essential for sustainable literary tourism.                                                                                                                   |
| 146 | Perhaps the movie "Hamon" is one of the examples that was shown in Iran and at that time caused a wave of young people traveling to Kashan.                                                           |
| 147 | The screening of "Kheily Door Kheily Nazdik" movie boosted travel to the deserts of Iran.                                                                                                             |
| 148 | The Shahnameh book is one of the works that can be adapted to make interesting literary places.                                                                                                       |
| 149 | Holding literary tourism workshops in universities and cultural centers can help promote and educate in this field.                                                                                   |
| 150 | Any kind of development, including in the field of cultural-literary development, requires appropriate platforms and infrastructures.                                                                 |
| 151 | The development and promotion of literary tourism requires constructive interactions at the international and national levels.                                                                        |
| 152 | Literary places can be built based on literary narratives.                                                                                                                                            |
| 153 | The great potential of Iran's literary heritage can serve to boost tourism.                                                                                                                           |
| 154 | The culture sector in Iran needs educated managers who know the value and place of the country's literary heritage.                                                                                   |
| 155 | Many tombs of writers are not attractive enough and need more attractive architecture                                                                                                                 |
| 156 | We should take advantage of the experiences of successful countries, especially UNESCO's literary creative cities                                                                                     |
| 157 | Determining the tourism map is necessary for every famous writer.                                                                                                                                     |
| 158 | Let's build symbolic monuments for poets and writers of Persian language who are not in the geographical area of Iran or whose burial place is not known.                                             |
| 159 | The development of cultural-literary tourism requires efficient institution building.                                                                                                                 |
| 160 | Literary tourism marketing requires very high creativity.                                                                                                                                             |
| 161 | The great potential of Iran's rich literary heritage can be used to boost tourism.                                                                                                                    |
| 162 | Holding international book fairs with a specialized approach to the field of literature can help boost literary travel.                                                                               |
| 163 | Officials of the country's cultural and historical heritage sector can use innovation and creativity in urban spaces.                                                                                 |
| 164 | The oral heritage of local folklore should be used to build places or literary attractions.                                                                                                           |
| 165 | Saadi's house located in the historical context of Shiraz should be preserved, this house can be the foundation of literary tourism in Shiraz city and give a new identity to the historical context. |
